# Supplementary material for: Single laboratory validation of an environmentally friendly single extraction and cleanup method for quantitative determination of four priority polycyclic aromatic hydrocarbons in edible oils and fats
Source: Royal Society of Chemistry journal article supplement (doi:10.1039/c5ay01533b), 2015-01-01

**Figure S1.** (Top) Full scan chromatogram of sesame oil after clean-up with EZ-POP NP; (Bottom) mass spectrum of major interfering compound (retention time = 32.52 min) and reference spectrum from NIST library.

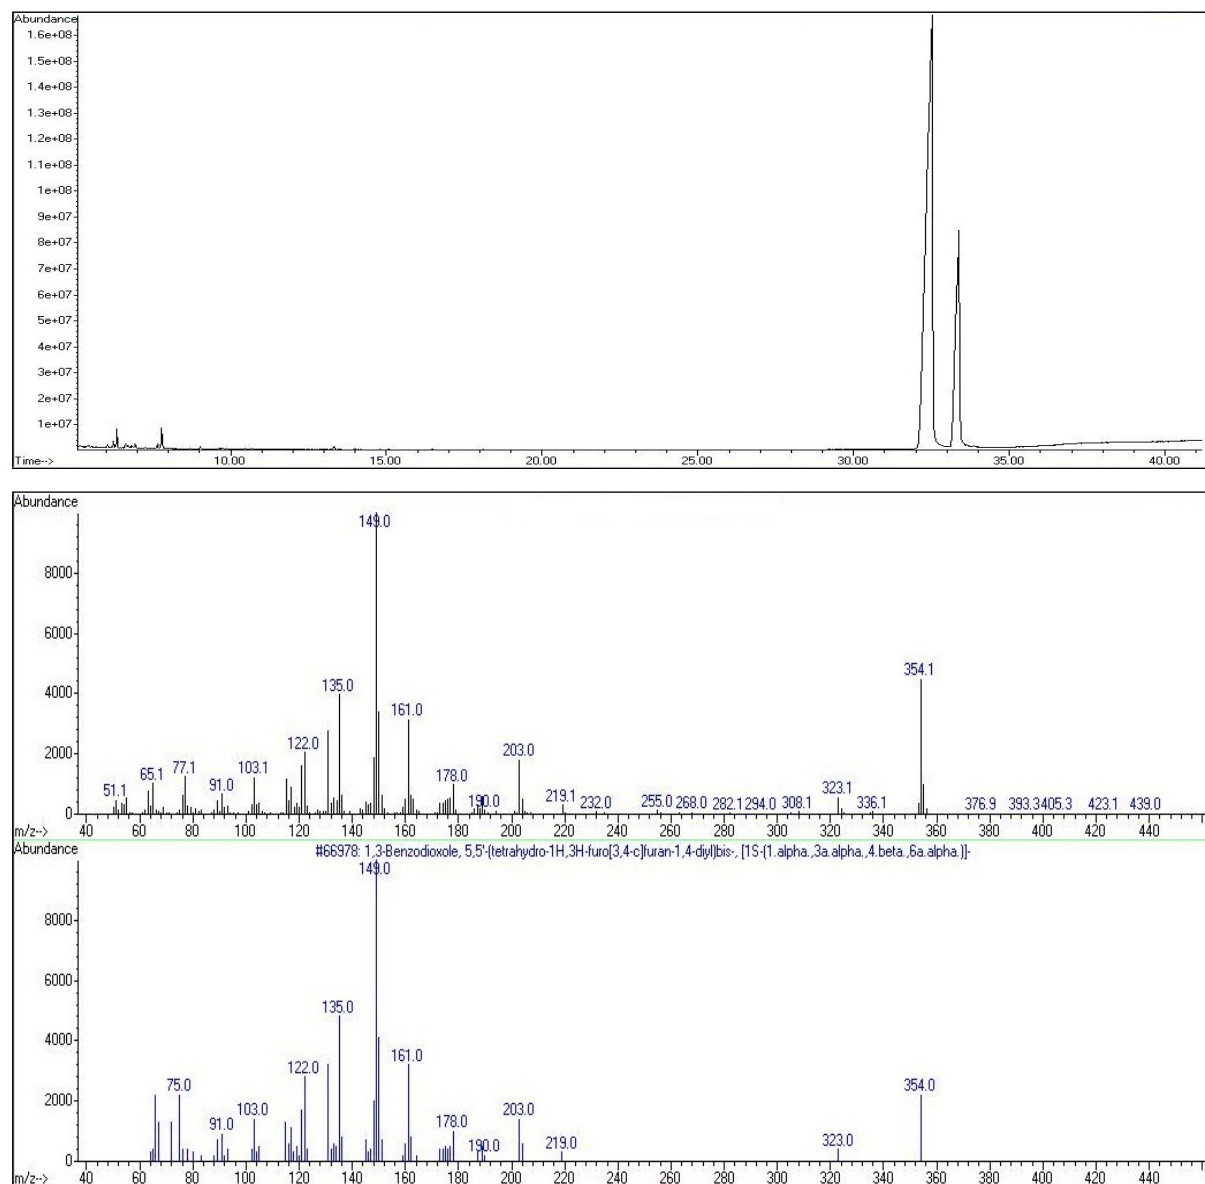

Supplement: c5ay01533b1.pdf [file c5ay01533b1.pdf]
