# Supplementary material for: Single laboratory validation of an environmentally friendly single extraction and cleanup method for quantitative determination of four priority polycyclic aromatic hydrocarbons in edible oils and fats
Source: Royal Society of Chemistry journal article supplement (doi:10.1039/c5ay01533b), 2015-01-01
Supplement: c5ay01533b2.pdf [file c5ay01533b2.pdf]

- 1 **Figure S2.** Full scan and extracted ion chromatogram of (a) olive oil; (b) corn oil; (c) peanut  
2 oil; (d) rapeseed oil; (e) sunflower seed oil; (f) vegetable oil; (g) soybean oil and (h) lard.  
3  
4 (a) Olive oil

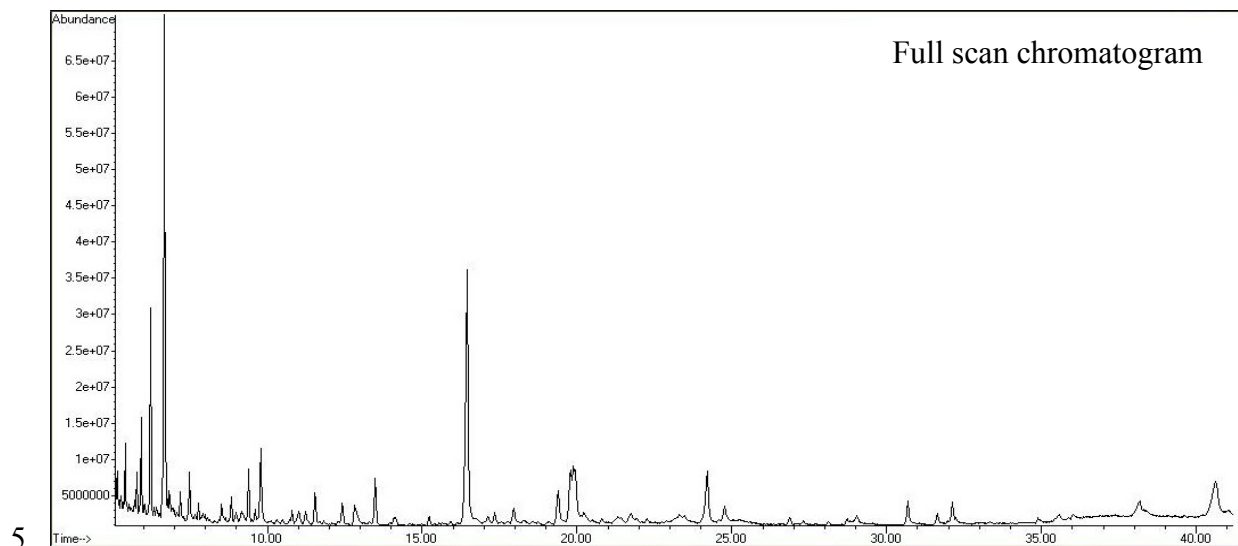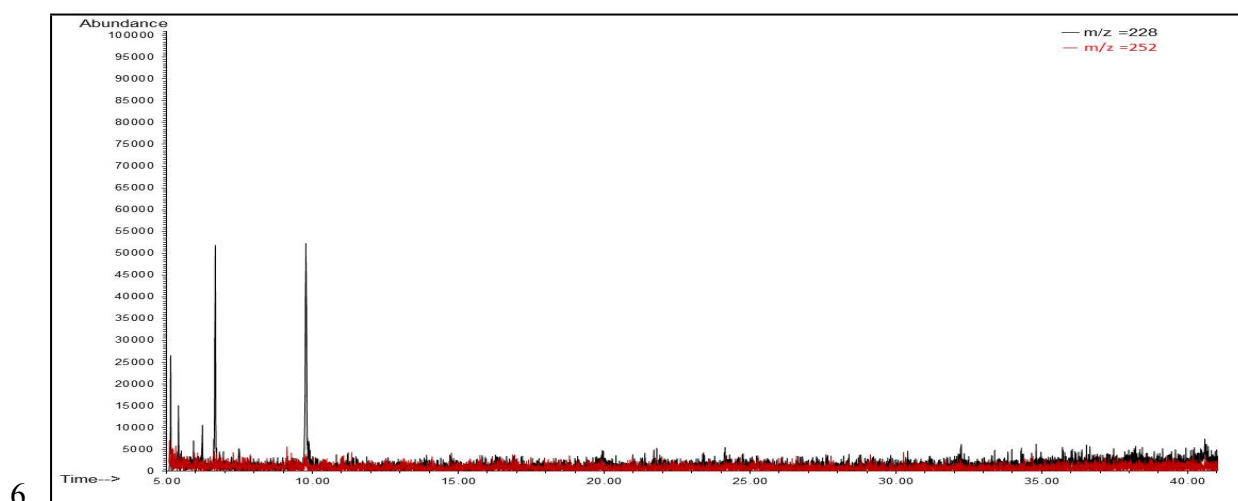

8 (b) Corn oil

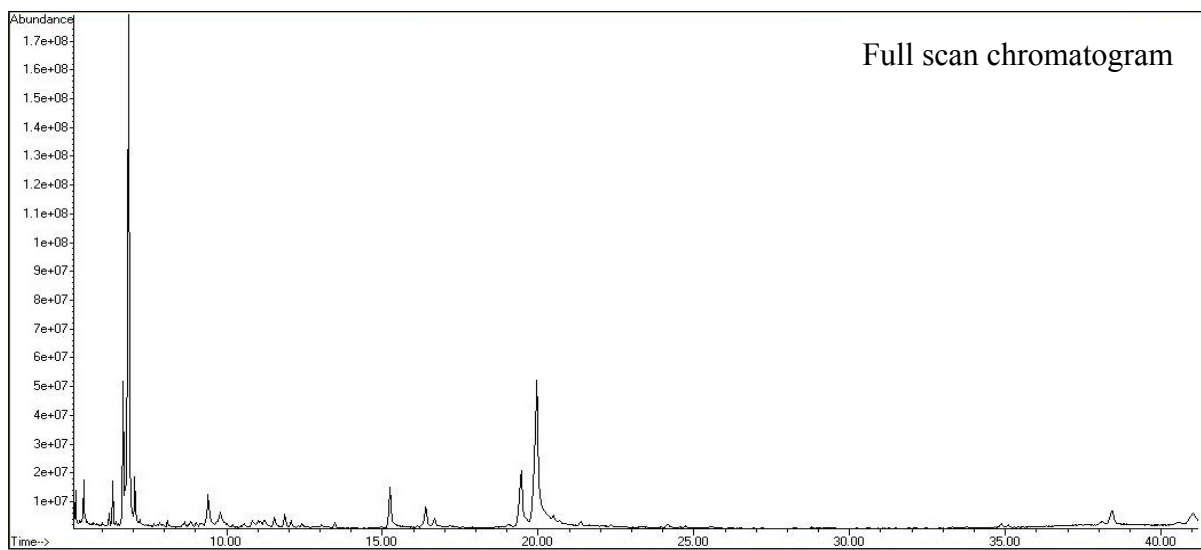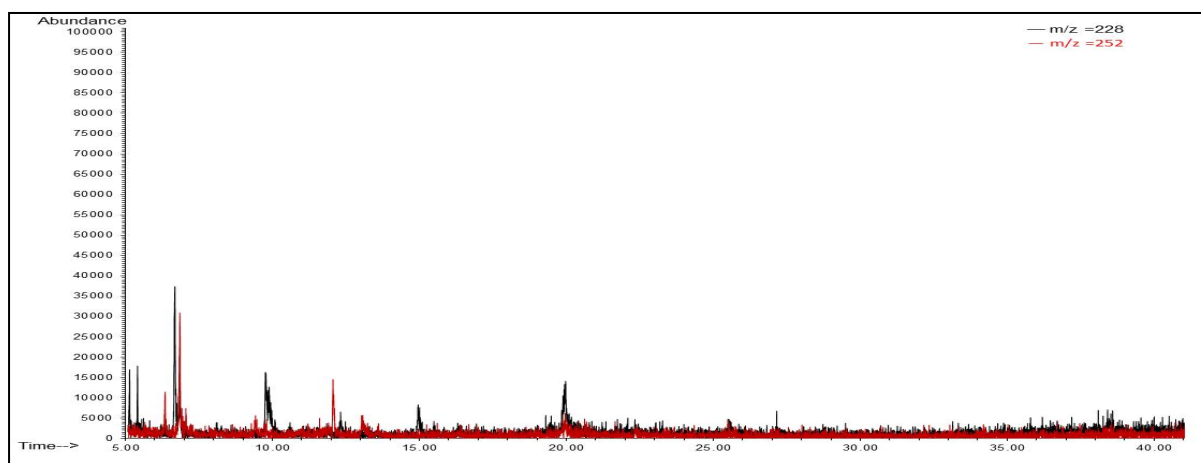

12 (c) Peanut oil

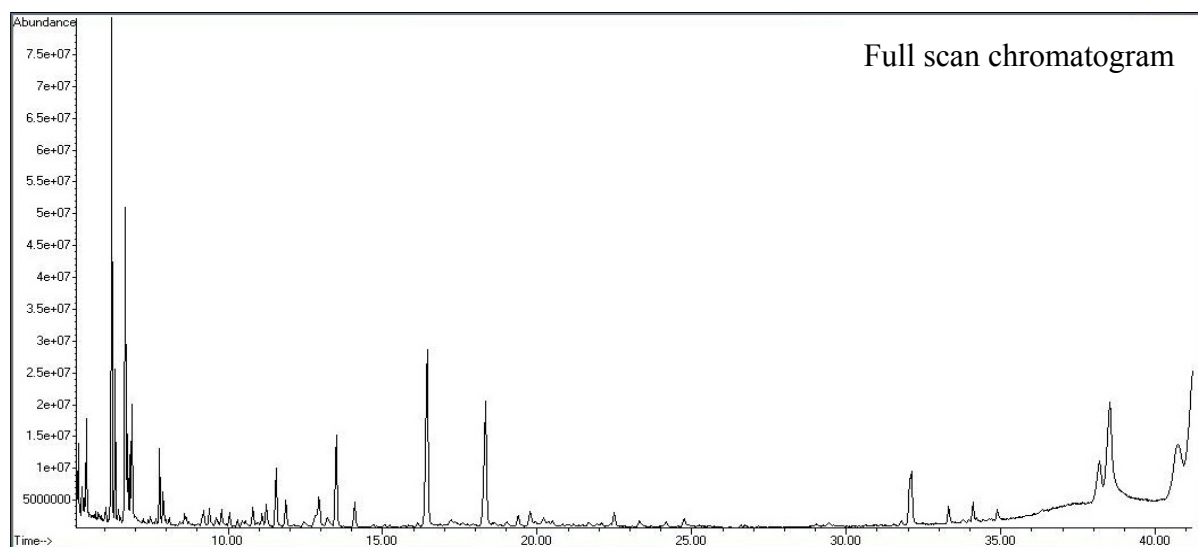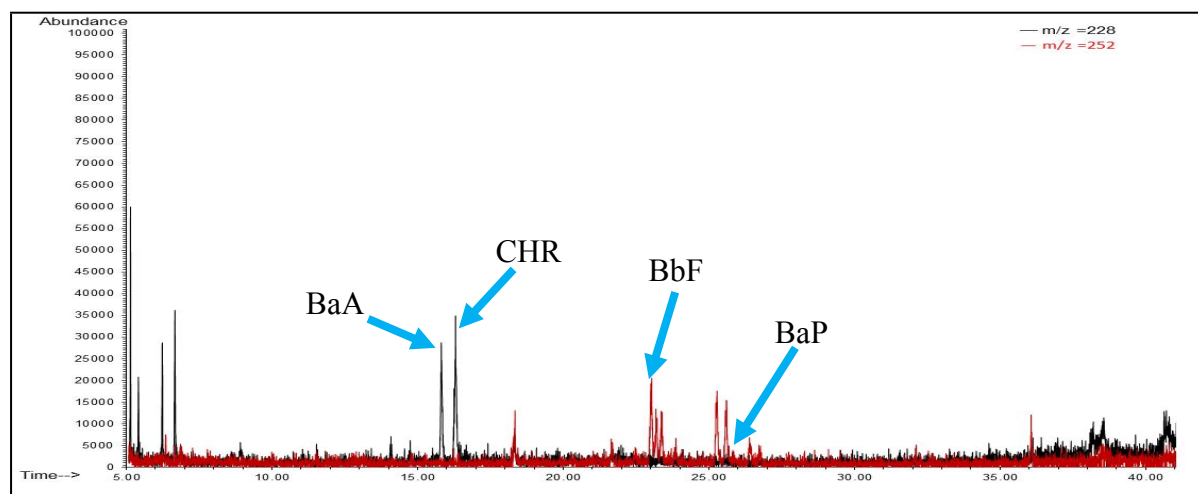

15

17 (d) Rapeseed oil

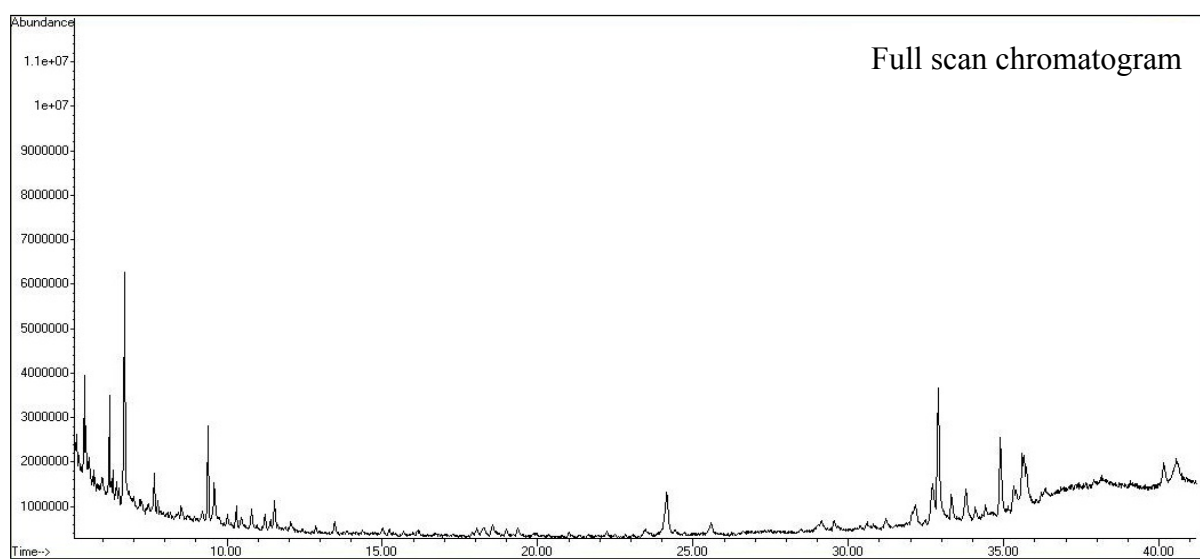

18

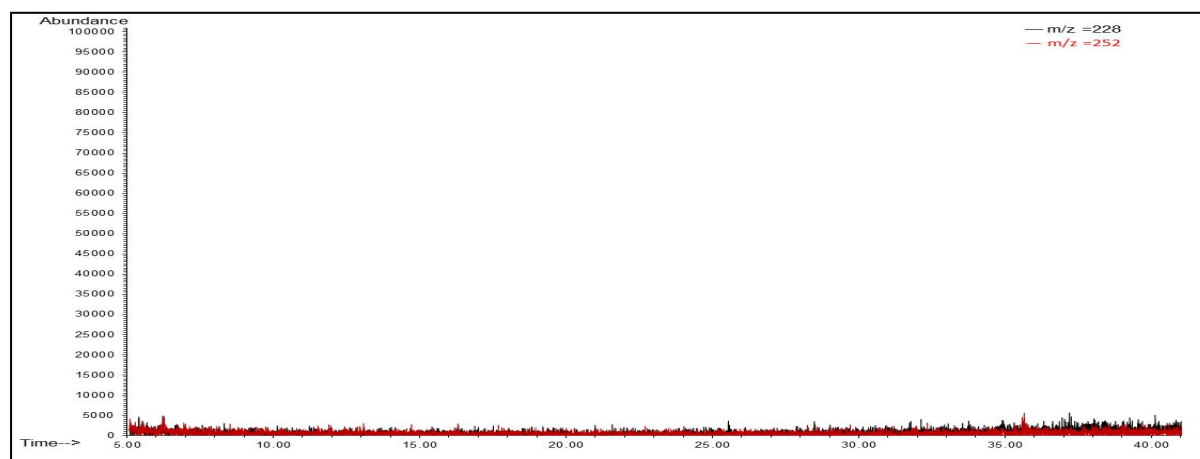

19

21 (e) Sunflower seed oil

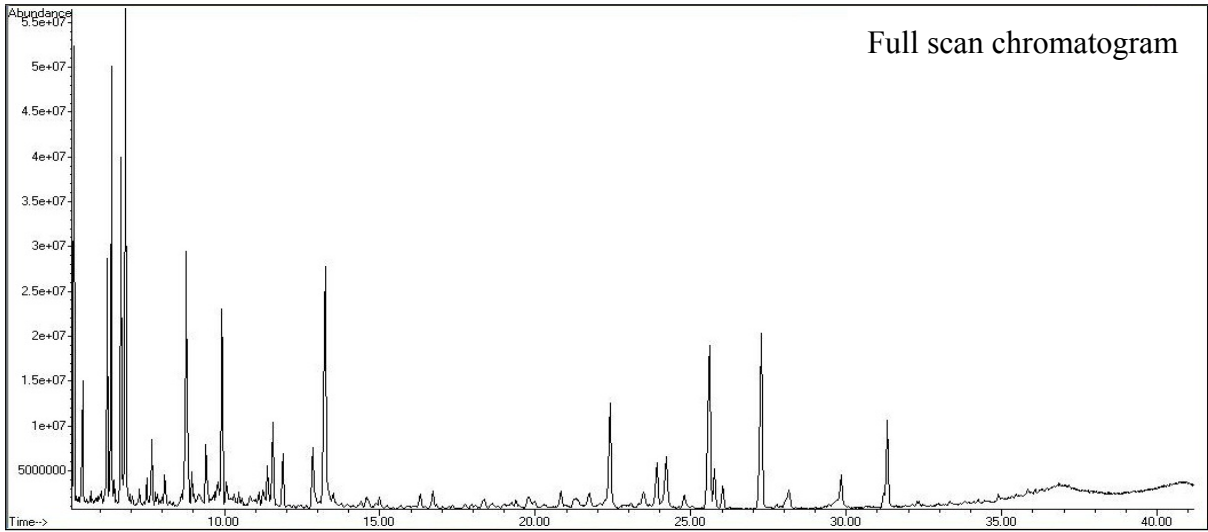

22

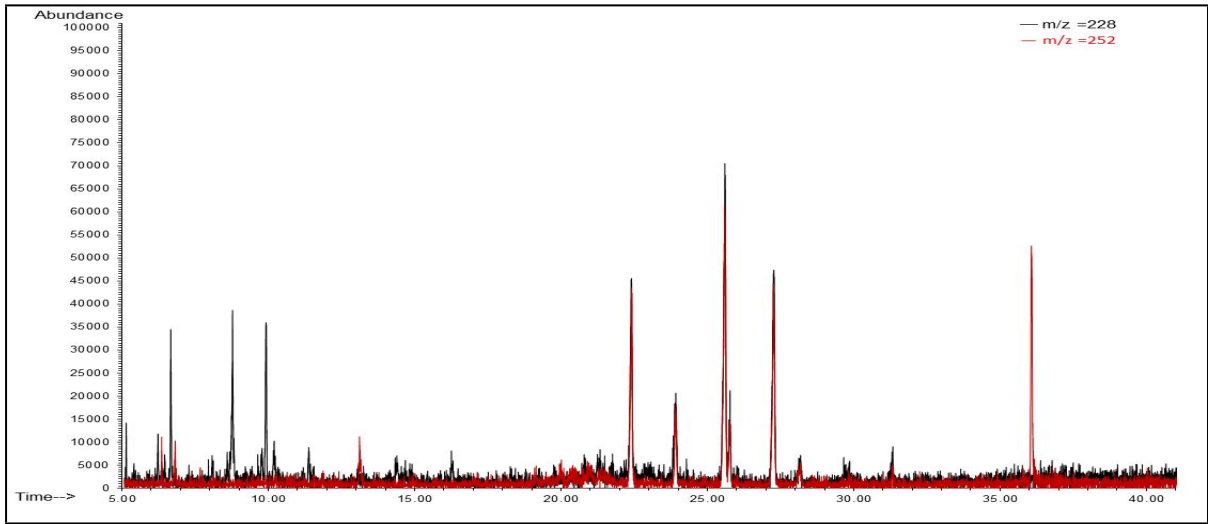

23

25 (f) Vegetable oil

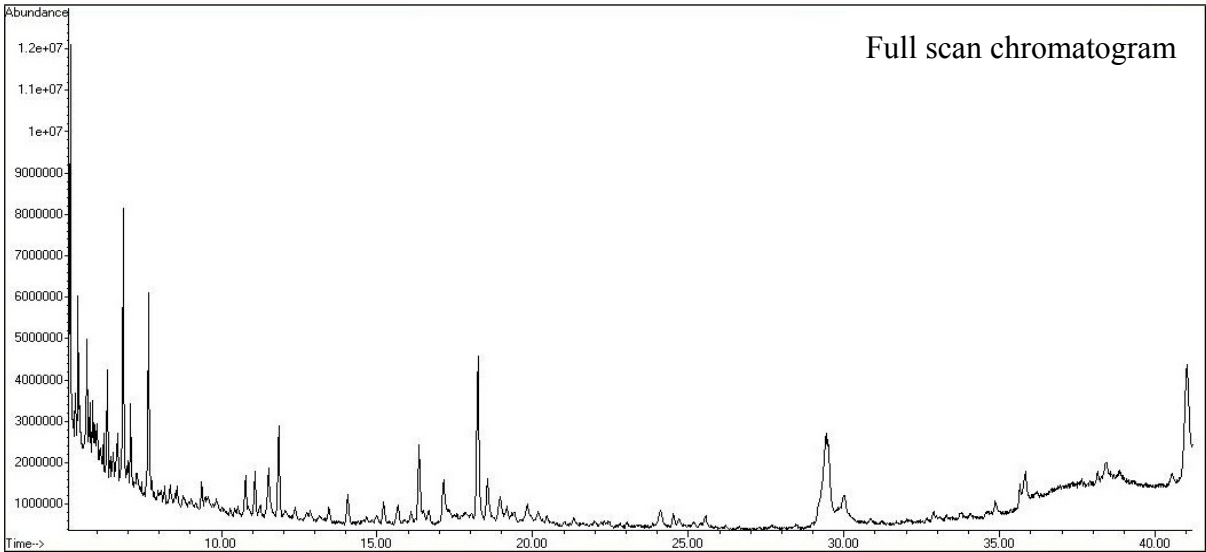

26

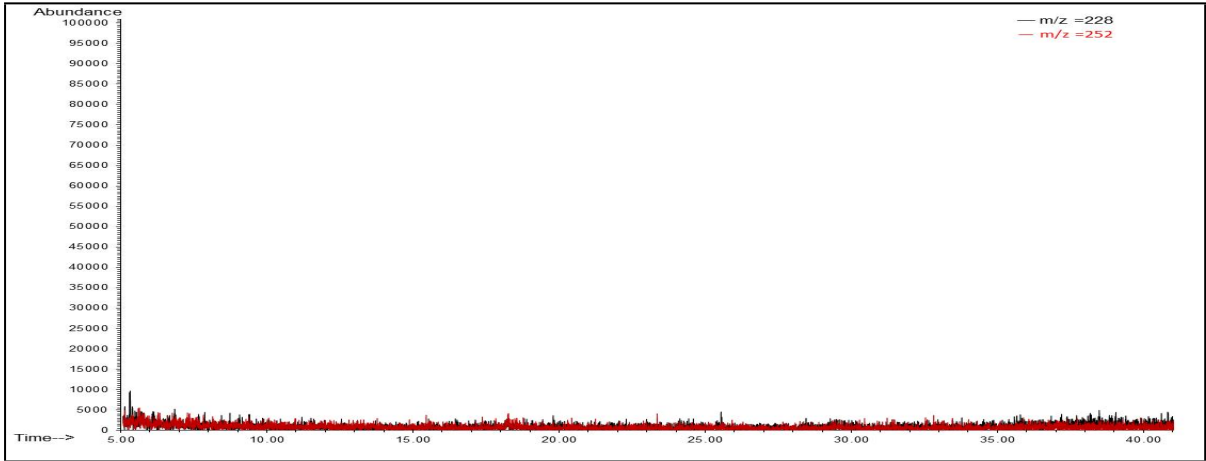

27

29 (g) Soybean oil

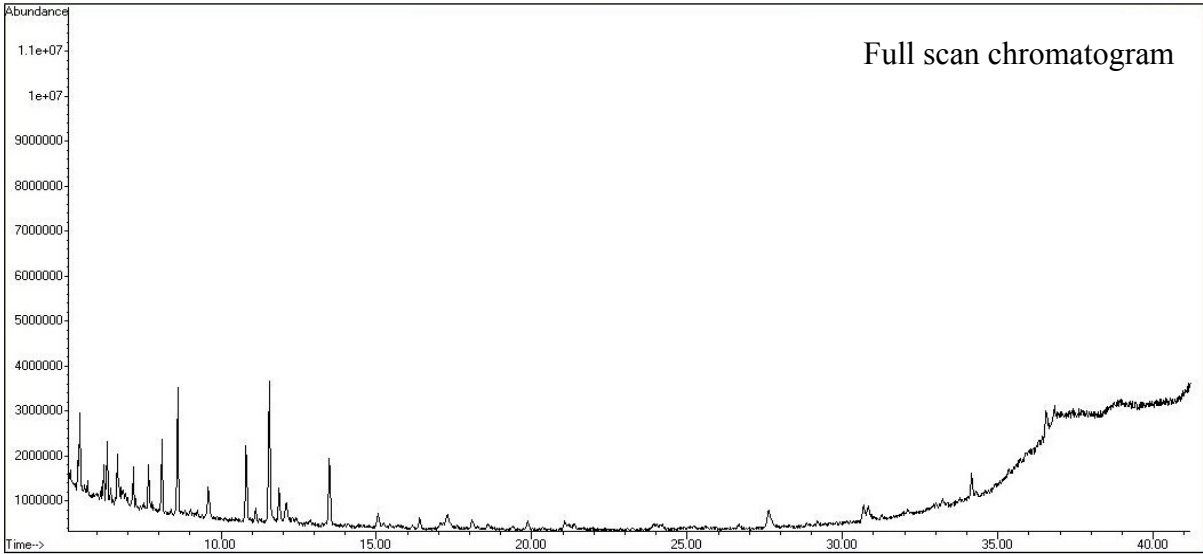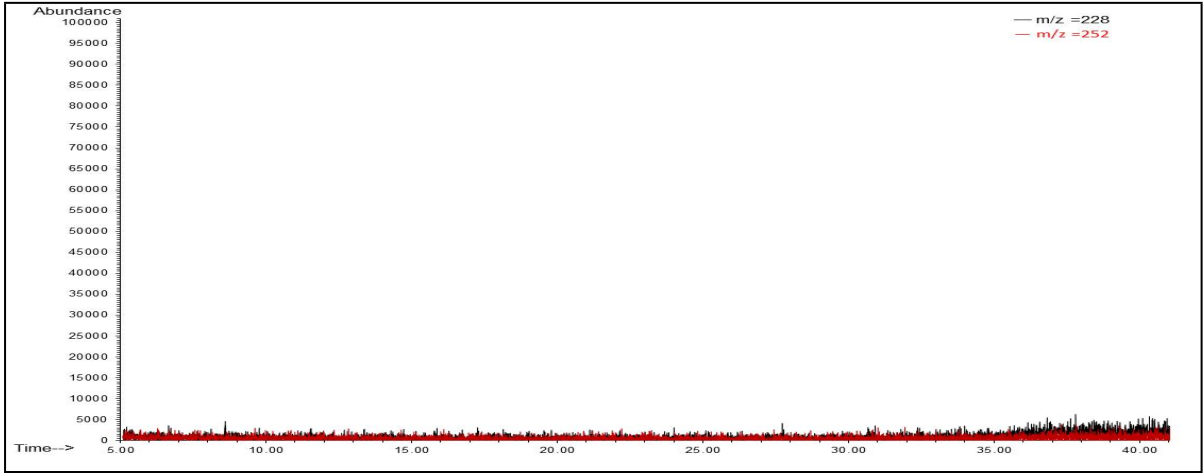

33 (h) Lard

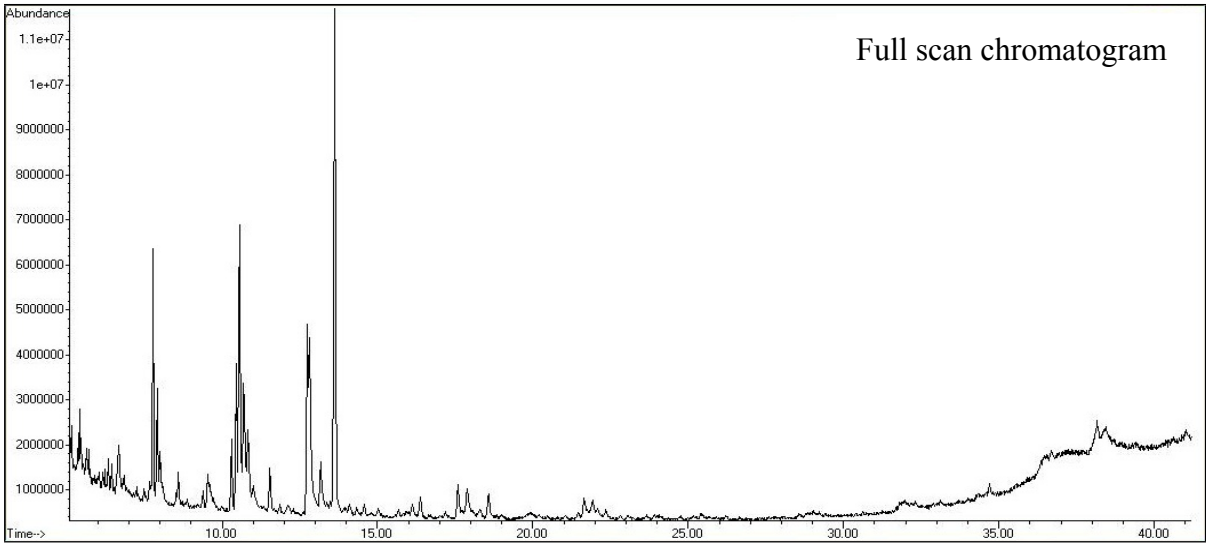

34

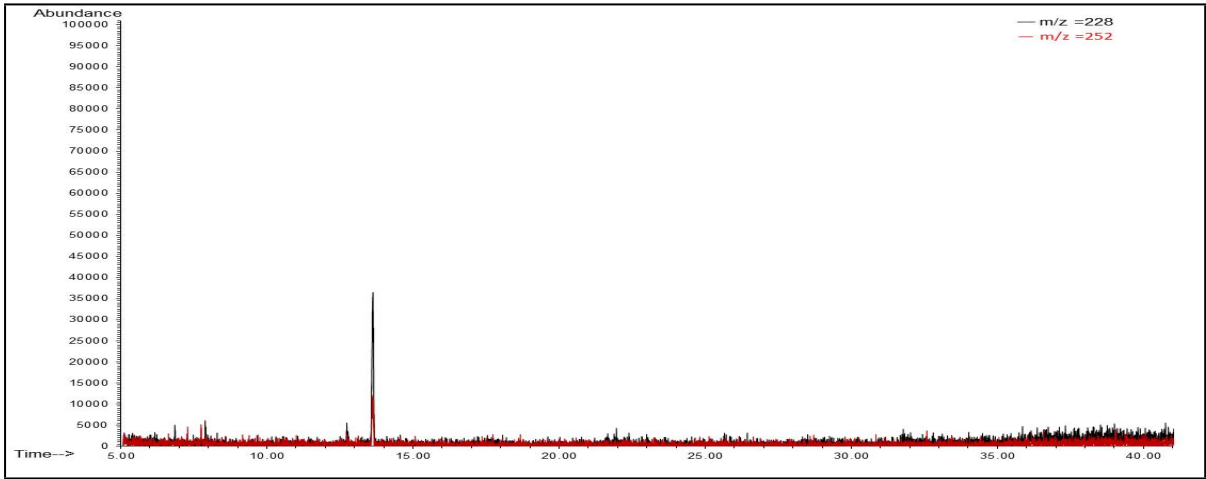

35
